# Supplementary material
Source: MDPI journal article supplement (https://www.mdpi.com/2076-3417/12/4/1806)
Supplement: s1 [file s1]

**Supplementary Information** Bajagain, R.; Gautam, P.; Le, T.T.N.; Dahal, R.H.; Kim, J.; Jeong, S.-W. Isolation and Screening of Odor-Reducing Microbes from Swine Manure and Its Role in Reducing Ammonia Release in Combination with Surfactant Foam. *Appl. Sci.* **2022**,

Table S1. Degradation of ammonia (NH<sub>3</sub>) by different microbial strains.

| SN | Strain name | Description<br>(Closest species)     | Ammonia test in the open jar at 22 °C (NH <sub>3</sub> concentration, ppm) |                              |                              |                             |                              |                            |                          |
|----|-------------|--------------------------------------|----------------------------------------------------------------------------|------------------------------|------------------------------|-----------------------------|------------------------------|----------------------------|--------------------------|
|    |             |                                      | Initial                                                                    | Bacteria*                    | 1 h                          | 12 h                        | 24 h                         | 36 h                       | 48 h                     |
| 0  | Control     | Media                                | 1000 ± 00.0 <sup>Aa</sup>                                                  | 320 ± 50.0 <sup>BCa</sup>    | 340 ± 36.1 <sup>Ba</sup>     | 240 ± 45.8 <sup>CDa</sup>   | 160 ± 17.3 <sup>DEab</sup>   | 120 ± 30.0 <sup>EFa</sup>  | 70 ± 10.0 <sup>Fab</sup> |
| 1  | TP1         | <i>Saccharomyces cerevisiae</i>      | 1000 ± 00.0 <sup>Aa</sup>                                                  | 120 ± 34.6 <sup>BCfg</sup>   | 180 ± 40.0 <sup>Bfg</sup>    | 140 ± 30.0 <sup>BCbcd</sup> | 80 ± 20.0 <sup>CDcd</sup>    | 50 ± 10.0 <sup>Dbc</sup>   | 50 ± 10.0 <sup>Dab</sup> |
| 2  | TP3         | <i>Lactococcus lactis</i>            | 1000 ± 00.0 <sup>Aa</sup>                                                  | 80 ± 20.0 <sup>Cg</sup>      | 120 ± 20.0 <sup>Bgh</sup>    | 50 ± 10.0 <sup>Ce</sup>     | 10 ± 10.0 <sup>De</sup>      | 10 ± 10.0 <sup>Dc</sup>    | 10 ± 5.8 <sup>Dc</sup>   |
| 3  | TP4         | <i>Bacillus paramycoides</i>         | 1000 ± 00.0 <sup>Aa</sup>                                                  | 150 ± 26.5 <sup>Befg</sup>   | 180 ± 17.3 <sup>Bfg</sup>    | 80 ± 20.0 <sup>Ccde</sup>   | 60 ± 10.0 <sup>Cde</sup>     | 50 ± 10.0 <sup>Cbc</sup>   | 40 ± 10.0 <sup>Cbc</sup> |
| 4  | TP5         | <i>Lactobacillus argenteratensis</i> | 1000 ± 00.0 <sup>Aa</sup>                                                  | 0 ± 00.0 <sup>Dh</sup>       | 100 ± 20.0 <sup>Bh</sup>     | 60 ± 10.0 <sup>Cde</sup>    | 10 ± 00.0 <sup>De</sup>      | 10 ± 00.0 <sup>Dc</sup>    | 10 ± 00.0 <sup>Dc</sup>  |
| 5  | YI2-3       | <i>Rhodococcus gordoniae</i>         | 1000 ± 00.0 <sup>Aa</sup>                                                  | 200 ± 34.6 <sup>Ccde</sup>   | 280 ± 20.0 <sup>Babced</sup> | 180 ± 20.0 <sup>Cab</sup>   | 120 ± 20.0 <sup>Dabced</sup> | 80 ± 10.0 <sup>DEab</sup>  | 50 ± 10.0 <sup>Eab</sup> |
| 6  | YI 1-2      | <i>Hydrogenophaga temperata</i>      | 1000 ± 00.0 <sup>Aa</sup>                                                  | 250 ± 17.3 <sup>BCabcd</sup> | 300 ± 20.0 <sup>Babc</sup>   | 200 ± 40.0 <sup>CDab</sup>  | 140 ± 26.5 <sup>DEabc</sup>  | 100 ± 20.0 <sup>EFab</sup> | 70 ± 10.0 <sup>Fab</sup> |
| 7  | HW4         | <i>Acidovorax delafieldii</i>        | 1000 ± 00.0 <sup>Aa</sup>                                                  | 300 ± 20.0 <sup>Bab</sup>    | 340 ± 17.3 <sup>Ba</sup>     | 180 ± 40.0 <sup>Cab</sup>   | 140 ± 20.0 <sup>CDabc</sup>  | 100 ± 30.0 <sup>DEab</sup> | 70 ± 20.0 <sup>Eab</sup> |
| 8  | Buk3        | <i>Shinella zoogloeoides</i>         | 1000 ± 00.0 <sup>Aa</sup>                                                  | 260 ± 20.0 <sup>BCabc</sup>  | 300 ± 34.6 <sup>Babc</sup>   | 220 ± 40.0 <sup>CDab</sup>  | 160 ± 34.6 <sup>DEab</sup>   | 120 ± 20.0 <sup>EFa</sup>  | 70 ± 10.0 <sup>Fab</sup> |
| 9  | HW3         | <i>Pedococcus soli</i>               | 1000 ± 00.0 <sup>Aa</sup>                                                  | 300 ± 17.3 <sup>Bab</sup>    | 320 ± 20.0 <sup>Bab</sup>    | 220 ± 20.0 <sup>Cab</sup>   | 180 ± 20.0 <sup>Ca</sup>     | 120 ± 20.0 <sup>Da</sup>   | 80 ± 10.0 <sup>Da</sup>  |
| 10 | TP2         | <i>Pichia sorbitophila</i>           | 1000 ± 00.0 <sup>Aa</sup>                                                  | 180 ± 20.0 <sup>Bdef</sup>   | 200 ± 36.1 <sup>Bef</sup>    | 150 ± 20.0 <sup>BCbc</sup>  | 100 ± 20.0 <sup>CDbcd</sup>  | 60 ± 26.5 <sup>Dabc</sup>  | 50 ± 10.0 <sup>Dab</sup> |
| 11 | YI1-4       | <i>Sphingopyxis granuli</i>          | 1000 ± 00.0 <sup>Aa</sup>                                                  | 260 ± 20.0 <sup>BCabc</sup>  | 300 ± 20.0 <sup>Babc</sup>   | 240 ± 17.3 <sup>Ca</sup>    | 120 ± 26.5 <sup>Dabcd</sup>  | 100 ± 20.0 <sup>Dab</sup>  | 70 ± 10.0 <sup>Dab</sup> |
| 12 | YI1-6       | <i>Sphingobacterium humi</i>         | 1000 ± 00.0 <sup>Aa</sup>                                                  | 180 ± 20.0 <sup>Cdef</sup>   | 240 ± 26.5 <sup>Bcdef</sup>  | 200 ± 20.0 <sup>BCab</sup>  | 120 ± 17.3 <sup>Dabcd</sup>  | 70 ± 26.5 <sup>DEabc</sup> | 40 ± 20.0 <sup>Ebc</sup> |

|           |       |                                     |                           |                             |                             |                           |                              |                            |                          |
|-----------|-------|-------------------------------------|---------------------------|-----------------------------|-----------------------------|---------------------------|------------------------------|----------------------------|--------------------------|
| <b>13</b> | YI5-4 | <i>Nocardioides aromaticivorans</i> | 1000 ± 00.0 <sup>Aa</sup> | 200 ± 34.6 <sup>BCcde</sup> | 260 ± 20.0 <sup>Bbcde</sup> | 220 ± 20.0 <sup>Bab</sup> | 140 ± 20.0 <sup>CDabc</sup>  | 100 ± 34.6 <sup>DEab</sup> | 60 ± 17.3 <sup>Eab</sup> |
| <b>14</b> | S1    | <i>Sphingobacterium faecium</i>     | 1000 ± 00.0 <sup>Aa</sup> | 240 ± 10.0 <sup>BCbcd</sup> | 280 ± 20.0 <sup>Babcd</sup> | 200 ± 34.6 <sup>Cab</sup> | 120 ± 20.0 <sup>Dabcd</sup>  | 80 ± 20.0 <sup>DEab</sup>  | 60 ± 10.0 <sup>Eab</sup> |
| <b>15</b> | TP8   | <i>Nocardioides dubius</i>          | 1000 ± 00.0 <sup>Aa</sup> | 160 ± 17.3 <sup>BCef</sup>  | 210 ± 26.5 <sup>Bdef</sup>  | 150 ± 36.1 <sup>Cbc</sup> | 120 ± 20.0 <sup>CDabcd</sup> | 80 ± 20.2 <sup>DEab</sup>  | 40 ± 10.0 <sup>Ebc</sup> |
| <b>16</b> | Buk 2 | <i>Phreatobacter stygius</i>        | 1000 ± 00.0 <sup>Aa</sup> | 300 ± 20.0 <sup>Bab</sup>   | 320 ± 20.0 <sup>Bab</sup>   | 180 ± 34.6 <sup>Cab</sup> | 160 ± 10.0 <sup>CDab</sup>   | 120 ± 20.0 <sup>DEa</sup>  | 70 ± 10.0 <sup>Eab</sup> |

\*After adding 10 mL of the bacteria ( $2.3 \times 10^6 - 3.6 \times 10^6$  cells/1 mL) for trial or 10 mL water for control

The values are mean ± standard deviation. Different superscript lowercase letters within a column indicate statistically significant differences among the strains in the same evaluation periods ( $p < 0.05$ ). Different superscript capital letters within a row indicate statistically significant differences among the different evaluation periods of a strain ( $p < 0.05$ ).

Table S2. Degradation of NH<sub>3</sub> in the capped jar (conducted at 22°C) .

| No.      | Strain name | NH <sub>3</sub> concentration (ppm) at ambient temperature |                          |                          |                                      |                          |
|----------|-------------|------------------------------------------------------------|--------------------------|--------------------------|--------------------------------------|--------------------------|
|          |             | Initial                                                    | Bacteria*                | 12 h                     | 24 h                                 | 36 h                     |
| <b>1</b> | <b>TP1</b>  | 1000 ± 00.0 <sup>Aa</sup>                                  | 480 ± 26.5 <sup>Ca</sup> | 580 ± 20.0 <sup>Ba</sup> | 560 ± 20.0 <sup>Ba</sup>             | 550 ± 30.0 <sup>Ba</sup> |
| <b>2</b> | <b>TP3</b>  | 1000 ± 00.0 <sup>Ab</sup>                                  | 120 ± 17.3 <sup>Cb</sup> | 220 ± 26.5 <sup>Bb</sup> | 200 ± 26.5 <sup>Bb</sup>             | 180 ± 20.0 <sup>Bb</sup> |
| <b>3</b> | <b>TP5</b>  | 1000 ± 00.0 <sup>Ab</sup>                                  | 100 ± 20.0 <sup>Db</sup> | 210 ± 10.0 <sup>Bb</sup> | 180 ± 20.0 <sup>B<sup>Cb</sup></sup> | 150 ± 10.0 <sup>Cb</sup> |

\*After adding 10 mL of the bacteria ( $2.3 \times 10^6 - 3.6 \times 10^6$  cells/1 mL) for trial or 10 mL water for control

The values are mean ± standard deviation. Different superscript lowercase letters within a column indicate statistically significant differences among the strains in the same evaluation periods ( $p < 0.05$ ). Different superscript capital letters within a row indicate statistically significant differences among the different evaluation periods of a strain ( $p < 0.05$ ).

Table S3. Degradation of NH<sub>3</sub> in the capped jar (conducted at 30 °C).

| No. | Strain name | NH <sub>3</sub> concentration (ppm) at 30 °C |                           |                          |                           |                           |
|-----|-------------|----------------------------------------------|---------------------------|--------------------------|---------------------------|---------------------------|
|     |             | Initial                                      | 1h (Bacteria*)            | 12 h                     | 24 h                      | 36 h                      |
| 1   | Control     | 1000 ± 00.0 <sup>Aa</sup>                    | 400 ± 91.7 <sup>Ca</sup>  | 560 ± 20.0 <sup>Ba</sup> | 520 ± 34.6 <sup>BCa</sup> | 520 ± 20.0 <sup>BCa</sup> |
| 2   | TP1         | 1000 ± 00.0 <sup>Aa</sup>                    | 500 ± 34.6 <sup>Ba</sup>  | 540 ± 26.5 <sup>Ba</sup> | 520 ± 17.3 <sup>Ba</sup>  | 510 ± 26.5 <sup>Ba</sup>  |
| 3   | TP3         | 1000 ± 00.0 <sup>Aa</sup>                    | 100 ± 20.0 <sup>Db</sup>  | 190 ± 10.0 <sup>Bb</sup> | 140 ± 10.0 <sup>Cb</sup>  | 100 ± 10.0 <sup>Db</sup>  |
| 4   | TP5         | 1000 ± 00.0 <sup>Aa</sup>                    | 100 ± 20.0 <sup>CDb</sup> | 150 ± 10.0 <sup>Bb</sup> | 120 ± 20.0 <sup>Cb</sup>  | 80 ± 10.0 <sup>Db</sup>   |

\*After adding 10 mL of the bacteria ( $2.3 \times 10^6 - 3.6 \times 10^6$  cells/1 mL) for trial or 10 mL water for control

The values are mean ± standard deviation. Different superscript lowercase letters within a column indicate statistically significant differences among the strains in the same evaluation periods ( $p < 0.05$ ). Different superscript capital letters within a row indicate statistically significant differences among the different evaluation periods of a strain ( $p < 0.05$ ).

## Figures

(A)

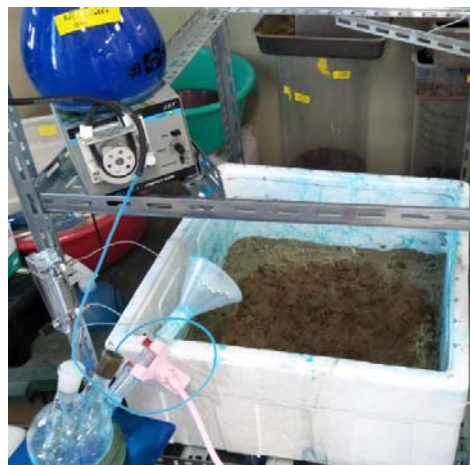

(B)

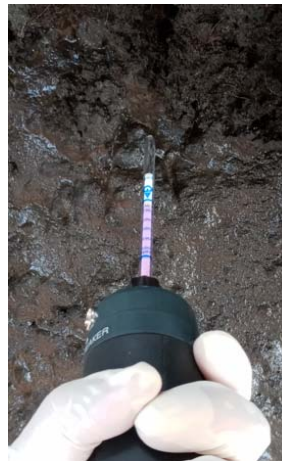

(C)

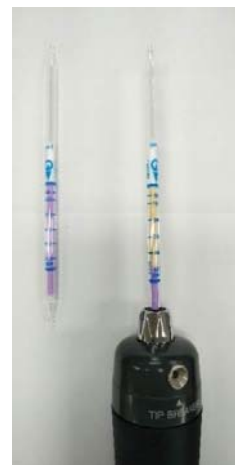

(D)

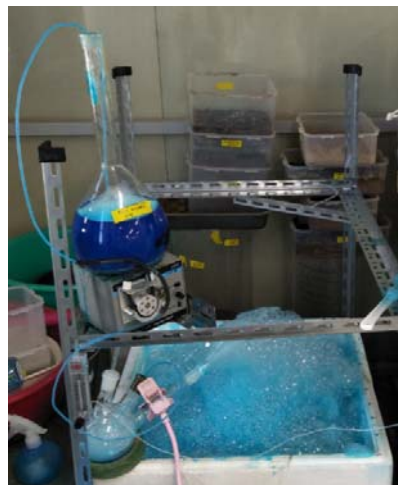

(E)

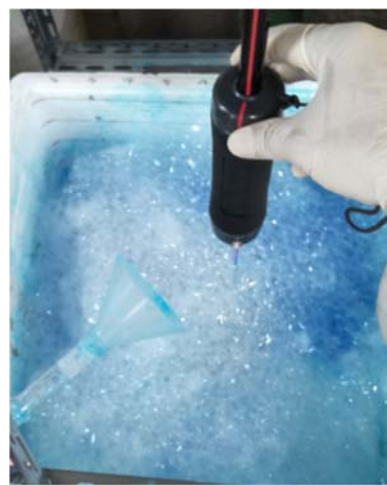

(F)

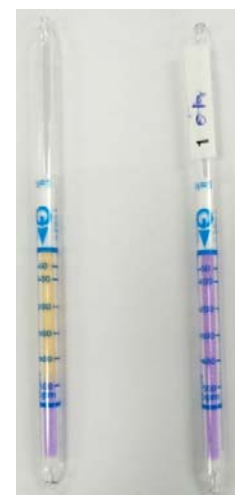

Figure S1. Laboratory odor reduction test; (A) experimental set-up using soil/swine manure in the polystyrene box; (B) initial sampling before foam spraying; (C) initial  $\text{NH}_3$  concentration (pink color changed to yellow); (D) covering the manure with surfactant foam spraying technology; (E) sampling after foam spraying; and (F)  $\text{NH}_3$  concentration after foam spraying or final sampling (no change in pink color, 0 ppm).

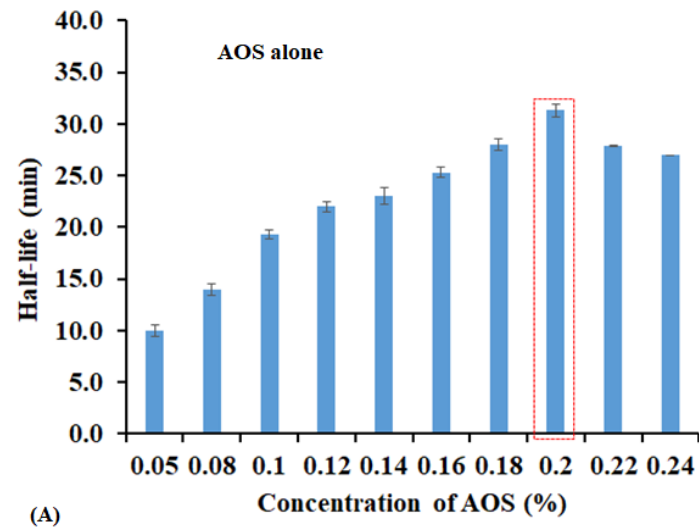

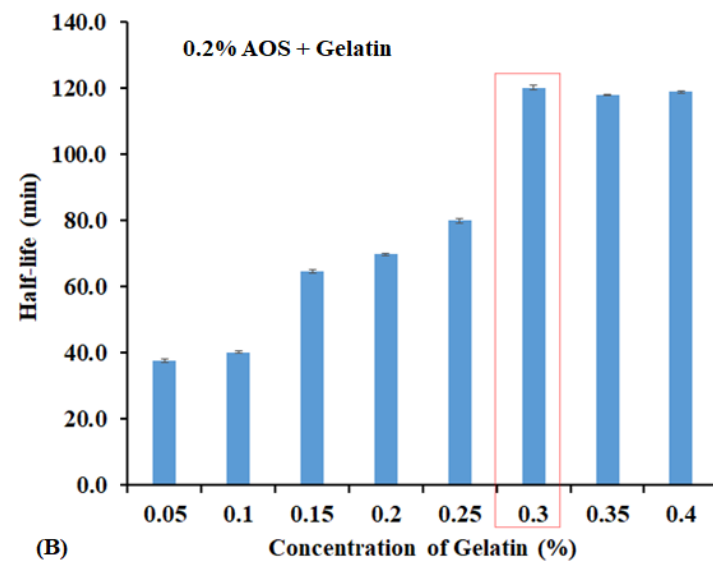

Figure S2. Effect of (A) AOS concentration and (B) AOS + gelatin concentration on foam stability

**Text S1.** Physiochemical properties of the soil used

In this experiment, the soil contaminated with  $\text{NH}_3$  solution was sandy loam having an organic matter content of 4.05%. The pH, EC and water content were 3.00, 101.59  $\mu\text{s}/\text{cm}$  and 0.06 g/g respectively. The bulk density of the soil was 1.10  $\text{g}/\text{cm}^3$  and porosity was 35.9% as shown in the Table below.

| Soil properties           | Unit                    | Value             |
|---------------------------|-------------------------|-------------------|
| Soil texture              |                         | Sandy loam        |
| Organic matter            | %                       | 4.05 $\pm$ 0.02   |
| pH                        |                         | 3.00 $\pm$ 0.22   |
| EC                        | $\mu\text{s}/\text{cm}$ | 101.59 $\pm$ 2.98 |
| Gravimetric water content | g/g                     | 0.06 $\pm$ 0.00   |
| Bulk density              | $\text{g}/\text{cm}^3$  | 1.10 $\pm$ 0.01   |
| Porosity                  | %                       | 35.9 $\pm$ 0.95   |

**Text S2. Reagent and materials**

In this experiment, ammonia solution was used as extra pure brought from Daejung Chemicals as shown in the Table below. Gelatin was brought in from Germany having 100% purity. Surfactant (AOS) was obtained from AK chemicals, South Korea. Surfactant was obtained in powdered form. Sandy loam soil was prepared (To make ammonia contaminated soil) by mixing fine sand, peatmoss (<2 mm) and kaolin clay in the proportion of 80:10:10 by weight. For the preparation of sandy loam soil, research grade sand was obtained from KSL, South Korea. Similarly peat-moss was brought in from Germany which was prepared in Lithuania (research grade) and kaolin clay was extra pure and obtained from Samchun Chemicals, South Korea.

| Reagents and materials                | Grade          | Company                                                       | %purity            |
|---------------------------------------|----------------|---------------------------------------------------------------|--------------------|
| Ammonia solution (NH <sub>4</sub> OH) | Extra pure     | Daejung chemicals, South Korea                                | NM                 |
| Gelatin                               | Pure           | Gelita, Germany                                               | 100                |
| Sodium alpha olefin sulfonate (AOS)   | Pure           | AK Chemicals, South Korea                                     | 35% Solubility     |
| Fine sand (KSL 5100)                  | Research Grade | KSL, South Korea                                              | NM                 |
| Peat-moss                             | Research Grade | Prepared in Lithuania (Durpeta), supplied by emijja, Germany. | Highly recommended |
| Kaolin clay                           | Extra pure     | Samchun chemicals, South Korea                                | NM                 |
